# Supplementary material for: Diethylenetriamine-driven assembly of a dimeric cadmium bromide hybrid and an organic bromide salt: structural, vibrational, optical, in silico study and biological insights
Source: Royal Society of Chemistry journal article supplement (doi:10.1039/d6ra02827f), 2026-04-21
Supplement: d6ra02827f1.pdf [file d6ra02827f1.pdf]

## Supplementary data

### **Diethylenetriamine-Driven Assembly of a Dimeric Cadmium Bromide Hybrid and an Organic Bromide Salt: Structural, Vibrational, Optical, in Silico study and Biological Insights**

Iteb Ben Mahmoud<sup>a</sup>, Mashaal A. Alghamdi<sup>b</sup>, Houda Lazreg Aref<sup>c</sup>, Noureddine Mhadhbi<sup>a,d</sup>,  
Hossam H. Nasrallah<sup>e</sup>, Ahlem Guesmi<sup>b</sup>, Naoufel Ben Hamadi<sup>b</sup>, Sandra Walha<sup>a</sup>, Ferdinando  
Costantino<sup>f</sup> and Houcine Naili<sup>a\*</sup>

<sup>a</sup> *Laboratory Physical-Chemistry of the Solid State, Department of Chemistry, Faculty of  
Sciences of Sfax, BP 1171, Sfax 3000, University of Sfax, Tunisia.*

<sup>b</sup> *Chemistry Department, College of Science, Imam Mohammad Ibn Saud Islamic University  
(IMSIU), Riyadh 11623, Saudi Arabia.*

<sup>c</sup> *University of Monastir, Higher Institute of Biotechnology of Monastir, Laboratory of  
Genetics, Biodiversity and Bioresources Valuation LR11S41, 5019 Monastir, Tunisia.*

<sup>d</sup> *University of Monastir, Preparatory Institute for Engineering Studies of Monastir, Monastir  
5019, Tunisia.*

<sup>e</sup> *Chemistry Department, Faculty of Biotechnology, Sinai University, Kantara 41632, Egypt.*

<sup>f</sup> *Department of Chemistry Biology and Biotechnologies, University of Perugia Via Elce di  
Sotto 8, 06123 Perugia, Italy.*

\* *Corresponding author e-mail address: [houcine\\_naili@yahoo.com](mailto:houcine_naili@yahoo.com)*

**Table S.1:** Crystallographic data and structure refinement for  $(C_4H_{16}N_3)[CdBr_5] \cdot H_2O$  and  $(C_4H_{16}N_3)Br_3$ .

| Empirical formula               | $(C_4H_{16}N_3)[CdBr_5] \cdot H_2O$                                  | $(C_4H_{16}N_3)Br_3$                                               |
|---------------------------------|----------------------------------------------------------------------|--------------------------------------------------------------------|
| Formula weight (g/mol)          | 636.16                                                               | 345.93                                                             |
| Crystal system                  | Monoclinic                                                           | Monoclinic                                                         |
| Space groupe                    | $P2_1/c$                                                             | $P2_1/c$                                                           |
| a (Å)                           | 10.3311(3)                                                           | 6.2138(5)                                                          |
| b (Å)                           | 10.4970(2)                                                           | 19.5497(16)                                                        |
| c (Å)                           | 14.6429(3)                                                           | 8.9715(9)                                                          |
| $\beta$ (°)                     | 110.462(3)                                                           | 93.211(8)                                                          |
| V (Å <sup>3</sup> )             | 1487.76(7)                                                           | 1088.13(17)                                                        |
| Z                               | 4                                                                    | 4                                                                  |
| Crystal size (mm <sup>3</sup> ) | $0.32 \times 0.23 \times 0.12$                                       | $0.47 \times 0.38 \times 0.22$                                     |
| Color                           | colorless                                                            | colorless                                                          |
| Shape                           | block-shaped                                                         | block-shaped                                                       |
| T (K)                           | 100.0(2)                                                             | 150.00(10)                                                         |
| Calculated density              | 2.840                                                                | 2.112                                                              |
| $\lambda$ (MoK $\alpha$ ) (Å)   | 0.71073 Å                                                            | 0.71073 Å                                                          |
| Absorption correction           | multi-scan                                                           | multi-scan                                                         |
| Measured reflexions             | 17601                                                                | 13441                                                              |
| Independant reflexions          | 3886                                                                 | 2221                                                               |
| Reflexions [ $I > 2\sigma(I)$ ] | 3444                                                                 | 1977                                                               |
| Domain of $\theta$ (°)          | $2.4 \leq \theta \leq 31.2$                                          | $3.1 \leq \theta \leq 26.4$                                        |
| $T_{\min}$ et $T_{\max}$        | 0.087, 1.000                                                         | 0.009, 0.085                                                       |
| Index range                     | $-14 \leq h \leq 14$<br>$-15 \leq k \leq 15$<br>$-16 \leq l \leq 20$ | $-7 \leq h \leq 7$<br>$-24 \leq k \leq 24$<br>$-11 \leq l \leq 11$ |
| Number of Parameters            | 132                                                                  | 94                                                                 |
| $R_1$                           | 0.041                                                                | 0.036                                                              |
| w $R_2$                         | 0.105                                                                | 0.088                                                              |
| Goof                            | 1.061                                                                | 1.026                                                              |

**Table S.2:** Geometric parameters (Å, °) of DETCdBr and DETBr.

---

| <b>DETCdBr</b>       |            |                          |              |
|----------------------|------------|--------------------------|--------------|
| Cd1—Br1              | 2.7422 (6) | Br1—Cd1—Br2              | 93.389 (17)  |
| Cd1—Br2              | 2.7559 (5) | Br1—Cd1—Br2 <sup>i</sup> | 171.367 (19) |
| Cd1—Br2 <sup>i</sup> | 2.8462 (6) | Br1—Cd1—Br3              | 85.307 (16)  |
| Cd1—Br3              | 2.8438 (5) | Br1—Cd1—Br4              | 92.753 (17)  |
| Cd1—Br4              | 2.7590 (5) | Br1—Cd1—Br5              | 93.528 (17)  |
| Cd1—Br5              | 2.7579 (5) | Br2—Cd1—Br2 <sup>i</sup> | 83.462 (16)  |
| O1—H1F               | 0.86       | Br2—Cd1—Br3              | 91.367 (16)  |
| O1—H1G               | 0.87       | Br2—Cd1—Br4              | 173.543 (19) |
| N3—C4                | 1.482 (6)  | Br2—Cd1—Br5              | 92.142 (16)  |
| N1—C1                | 1.482 (6)  | Br3—Cd1—Br2 <sup>i</sup> | 86.730 (16)  |
| N2—C2                | 1.503 (6)  | Br4—Cd1—Br2 <sup>i</sup> | 90.732 (17)  |
| N2—C3                | 1.488 (6)  | Br4—Cd1—Br3              | 91.118 (16)  |
| C1—C2                | 1.524 (7)  | Br5—Cd1—Br2 <sup>i</sup> | 94.619 (17)  |
| C3—C4                | 1.517 (7)  | Br5—Cd1—Br3              | 176.362 (18) |
|                      |            | Br5—Cd1—Br4              | 85.491 (16)  |
|                      |            | Cd1—Br2—Cd1 <sup>i</sup> | 96.538 (16)  |
|                      |            | H1F—O1—H1G               | 109.5        |
|                      |            | C3—N2—C2                 | 112.4 (4)    |
|                      |            | N2—C2—C1                 | 113.3 (4)    |
|                      |            | N2—C3—C4                 | 108.4 (4)    |
|                      |            | N3—C4—C3                 | 110.6 (4)    |
| <b>DETBr</b>         |            |                          |              |
| N1—C1                | 1.483 (6)  | C3—N2—C2                 | 114.2 (3)    |
| N2—C2                | 1.501 (5)  | N2—C2—C1                 | 111.8 (3)    |
| N2—C3                | 1.488 (5)  | N2—C3—C4                 | 109.1 (3)    |
| C1—C2                | 1.503 (6)  | N3—C4—C3                 | 110.1 (4)    |
| C3—C4                | 1.515 (6)  | N1—C1—C2                 | 113.8 (3)    |

---

**Table S.3:** Hydrogen bonding geometry (Å, °) of DETCdBr.

| $D-H\cdots A$                       | $D-H$ | $H\cdots A$ | $D\cdots A$ | $D-H\cdots A$ |
|-------------------------------------|-------|-------------|-------------|---------------|
| O1—H1F $\cdots$ Br2                 | 0.87  | 2.82        | 3.432 (4)   | 129           |
| O1—H1F $\cdots$ Br3                 | 0.87  | 2.72        | 3.385 (4)   | 135           |
| O1—H1G $\cdots$ Br4 <sup>ii</sup>   | 0.87  | 2.47        | 3.330 (4)   | 171           |
| N3—H00C $\cdots$ Br1 <sup>iii</sup> | 0.91  | 2.39        | 3.287 (4)   | 167           |
| N3—H00A $\cdots$ Br2 <sup>iv</sup>  | 0.91  | 2.65        | 3.441 (4)   | 146           |
| N3—H00B $\cdots$ Br4 <sup>v</sup>   | 0.91  | 2.60        | 3.282 (4)   | 132           |
| N1—H1A $\cdots$ Br3 <sup>i</sup>    | 0.91  | 2.56        | 3.325 (5)   | 143           |
| N1—H1C $\cdots$ Br4 <sup>vi</sup>   | 0.91  | 2.44        | 3.343 (4)   | 170           |
| N1—H1B $\cdots$ O1 <sup>vii</sup>   | 0.91  | 1.82        | 2.721 (6)   | 168           |
| N2—H2A $\cdots$ Br3 <sup>v</sup>    | 0.91  | 2.46        | 3.299 (4)   | 154           |
| N2—H2B $\cdots$ Br5                 | 0.91  | 2.39        | 3.226 (4)   | 152           |
| C4—H4B $\cdots$ O1 <sup>i</sup>     | 0.99  | 2.48        | 3.303 (6)   | 141           |

Symmetry codes: (i)  $-x+1, -y+1, -z+1$ ; (ii)  $x, -y+1/2, z+1/2$ ; (iii)  $-x, y+1/2, -z+1/2$ ; (iv)  $x, -y+3/2, z-1/2$ ; (v)  $x, y+1, z$ ; (vi)  $x, -y+3/2, z+1/2$ ; (vii)  $-x+1, y+1/2, -z+3/2$ .

**Table S.4:** Hydrogen bonding geometry (Å, °) of DETBr.

| $D-H\cdots A$                      | $D-H$ | $H\cdots A$ | $D\cdots A$ | $D-H\cdots A$ |
|------------------------------------|-------|-------------|-------------|---------------|
| N1—H1C $\cdots$ Br1                | 0.91  | 2.47        | 3.203 (3)   | 138           |
| N1—H1A $\cdots$ Br1 <sup>i</sup>   | 0.91  | 2.36        | 3.250 (3)   | 168           |
| N1—H1B $\cdots$ Br3 <sup>ii</sup>  | 0.91  | 2.42        | 3.310 (4)   | 167           |
| N2—H2A $\cdots$ Br1 <sup>i</sup>   | 0.91  | 2.65        | 3.286 (4)   | 127           |
| N2—H2A $\cdots$ Br2                | 0.91  | 2.66        | 3.305 (3)   | 129           |
| N2—H2B $\cdots$ Br3                | 0.91  | 2.39        | 3.257 (3)   | 159           |
| N3—H3B $\cdots$ Br2 <sup>iii</sup> | 0.91  | 2.58        | 3.453 (4)   | 162           |
| N3—H3A $\cdots$ Br2 <sup>iv</sup>  | 0.91  | 2.50        | 3.372 (4)   | 161           |

Symmetry codes : (i)  $x+1, y, z$ ; (ii)  $-x+1, -y+1, -z$ ; (iii)  $x, -y+1/2, z+1/2$ ; (iv)  $x+1, -y+1/2, z+1/2$ .

**Table S.5:** Global Reactivity Descriptors of DETBr and DETCdBr Calculated from HOMO–LUMO Energies.

| Parameter                             | DETBr   | DETCdBr  |
|---------------------------------------|---------|----------|
| HOMO (eV)                             | -22.03  | -17.018  |
| LUMO (eV)                             | -13.65  | -13.714  |
| Energy Gap, Eg (eV, FMO)              | 8.378   | 3.304    |
| Optical Band Gap (eV)                 | ~6.08   | ~2.85    |
| Dipole Moment (D)                     | 13.54   | 60.89    |
| SCF Energy (eV)                       | -2190.9 | -3233.53 |
| Chemical Potential, $\mu$ (eV)        | -17.84  | -15.37   |
| Electronegativity, $\chi$ (eV)        | 17.84   | 15.37    |
| Chemical Hardness, $\eta$ (eV)        | 4.19    | 1.65     |
| Softness, S (eV <sup>-1</sup> )       | 0.239   | 0.605    |
| Electrophilicity Index, $\omega$ (eV) | 38.0    | 71.5     |

**Table S.6:** Predicted Physicochemical and ADME Properties of DETBr and DETCdBr.

| Parameter        | Property                 | DETBr                | DETCdBr                    |
|------------------|--------------------------|----------------------|----------------------------|
| Physicochemical  | Molecular Weight (g/mol) | 345.93               | 636.16                     |
|                  | TPSA                     | 71.89                | 162.24                     |
| Lipophilicity    | Consensus Log P          | -4.75                | -10.58                     |
| Water Solubility | Ali Log S (Class)        | -1.92 (Very soluble) | -5.70 (Moderately soluble) |
| Pharmacokinetics | GI Absorption            | Low                  | Low                        |
|                  | BBB Permeant             | No                   | No                         |
|                  | P-gp Substrate           | Yes                  | Yes                        |

|               |                         |      |                          |
|---------------|-------------------------|------|--------------------------|
| Drug-likeness | Lipinski Violations     | 0    | 2 (MW > 500, TPSA > 140) |
|               | Veber Violations        | 0    | 1 (TPSA > 140)           |
|               | Bioavailability Score   | 0.55 | 0.11                     |
| Synthesis     | Synthetic Accessibility | 1.42 | 4.17                     |

**Table S.7:** Molecular Docking Interactions of Acarbose, DETBr, and DETCdBBr with  $\alpha$ -Amylase (PDB ID: 4W93).

| Ligand   | Ligand Sites | Receptor Sites   | Type of Interaction | Distance (Å) | Binding Energy (kcal/mol) | Total Binding Energy (kcal/mol) |
|----------|--------------|------------------|---------------------|--------------|---------------------------|---------------------------------|
| Acarbose | O16          | THR A163         | H-donor             | 2.81         | -2.6                      | <b>-8.32</b>                    |
|          | O54          | ASP A300 (OD1)   | H-donor             | 2.95         | -0.9                      |                                 |
|          | O61          | ASP A300 (OD2)   | H-donor             | 3.03         | -1.0                      |                                 |
|          | O21          | GLN A63 (NE2)    | H-acceptor          | 3.00         | -2.1                      |                                 |
|          | C9           | TRP A59 (6-ring) | H- $\pi$            | 4.25         | -0.6                      |                                 |
|          | O38          | TRP A59 (5-ring) | H- $\pi$            | 3.62         | -2.4                      |                                 |
| DETBr    | N4           | ASP A300 (OD2)   | H-donor             | 2.83         | -9.5                      | <b>-4.84</b>                    |
|          | N9           | ASP A197 (OD1)   | H-donor             | 3.13         | -2.6                      |                                 |
|          | N9           | ASP A197 (OD2)   | H-donor             | 3.08         | -14.0                     |                                 |
|          | C18          | ASP A197 (OD1)   | H-donor             | 3.37         | -2.1                      |                                 |
|          | N4           | ASP A300 (OD2)   | Ionic               | 2.83         | -5.8                      |                                 |
|          | N9           | ASP A197         | Ionic               | 3.13         | -3.7                      |                                 |

|                |     |                   |            |      |       |              |
|----------------|-----|-------------------|------------|------|-------|--------------|
|                |     | (OD1)             |            |      |       |              |
|                | N9  | ASP A197<br>(OD2) | Ionic      | 3.08 | -4.0  |              |
| <b>DETCdBr</b> | N11 | ASP A356<br>(OD2) | H-donor    | 2.94 | -12.2 | <b>-5.43</b> |
|                | C20 | ASP A356<br>(OD2) | H-donor    | 3.45 | -0.7  |              |
|                | Br3 | ASN A298<br>(ND2) | H-acceptor | 3.77 | -0.6  |              |
|                | Br5 | ALA A307<br>(N)   | H-acceptor | 3.59 | -1.0  |              |
|                | Br6 | HIS A305<br>(NE2) | H-acceptor | 4.47 | -1.0  |              |
|                | Br6 | ASP A300<br>(OD1) | Ionic      | 3.23 | -3.1  |              |
|                | Br6 | ASP A300<br>(OD2) | Ionic      | 3.66 | -1.4  |              |
|                | N11 | ASP A356<br>(OD2) | Ionic      | 2.94 | -4.9  |              |
